# Supplementary material
Source: PubMed Central journal article supplement (PMC10648846)

Figure S1. Intergenomic similarity matrix for phages E2005-C, 109, and one phage from each ICTV-recognized species within the Pbinavirus genus. Matrix was constructed using VIRIDIC Web.

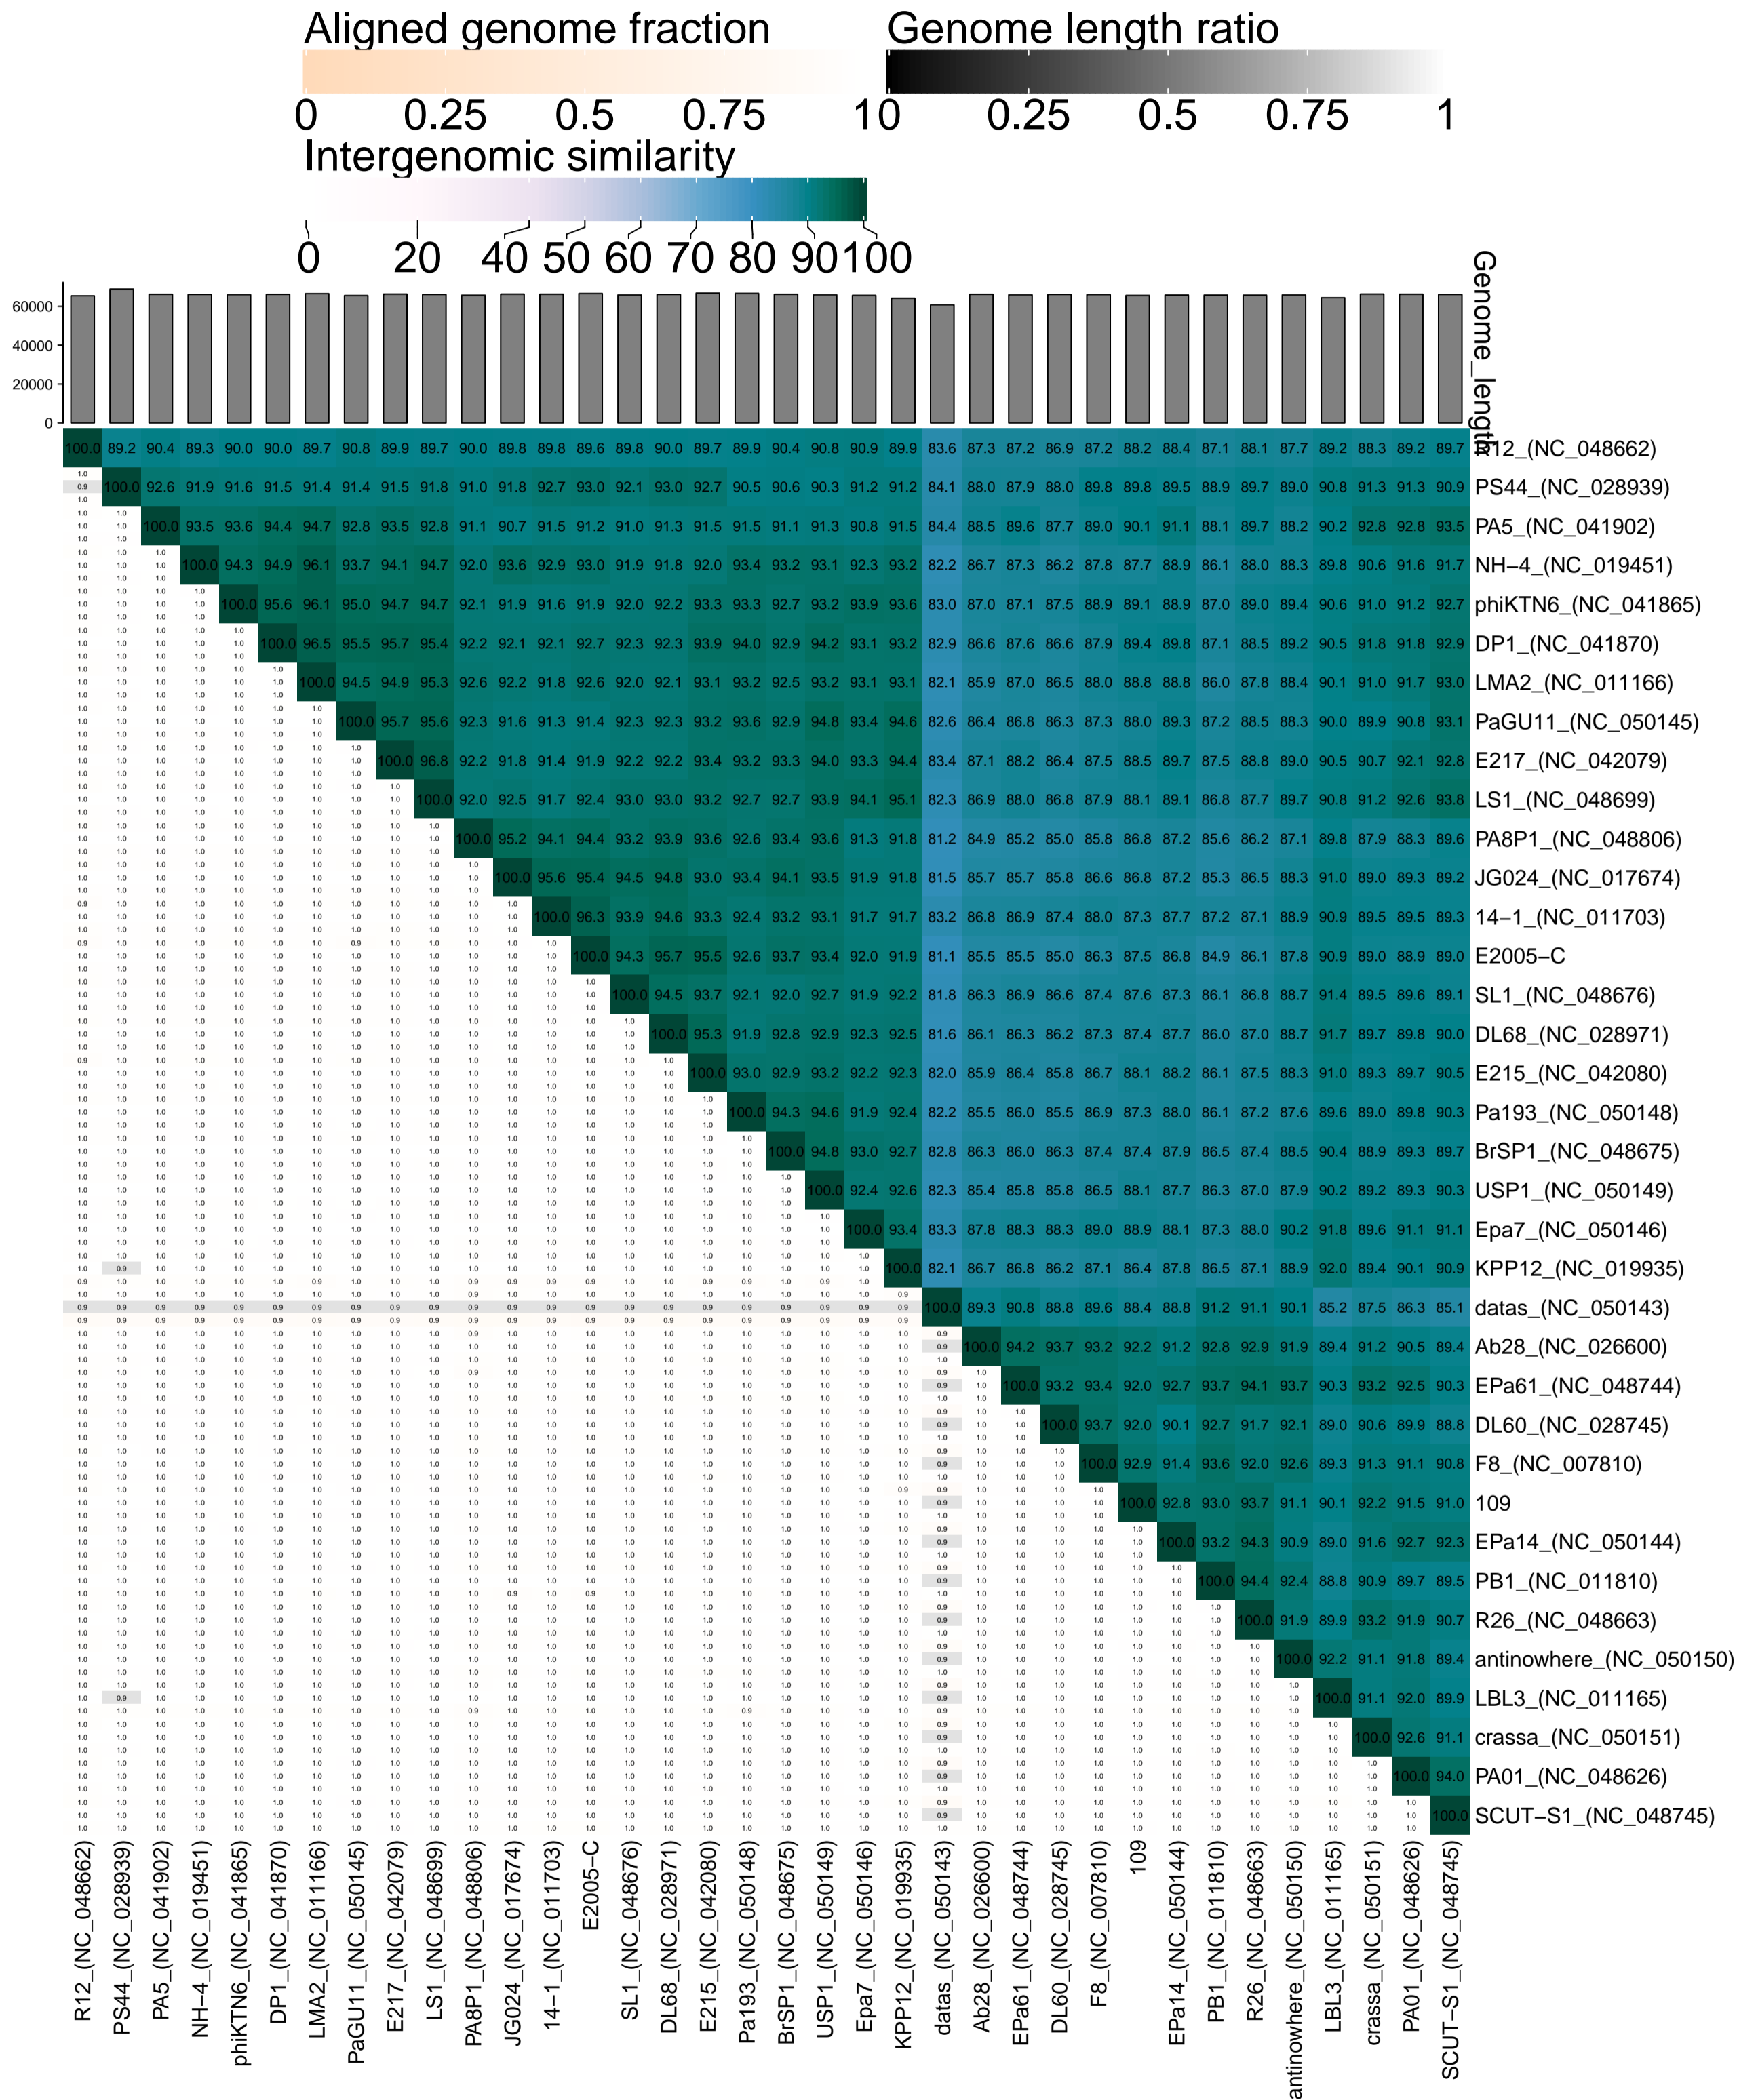

Supplement: aac.00578-23-s0001.pdf [file aac.00578-23-s0001.pdf]
